# Supplementary material for: Doubled Haploid ‘CUDH2107’ as a Reference for Bulb Onion (Allium cepa L.) Research: Development of a Transcriptome Catalogue and Identification of Transcripts Associated with Male Fertility
Source: PLoS One. 2016 Nov 18;11(11):e0166568. doi: 10.1371/journal.pone.0166568 (PMC5115759; doi:10.1371/journal.pone.0166568)
Supplement: S3 Table — (XLSX) [file pone.0166568.s003.xlsx]

## Sheet: Sheet1
Supplemental Table 3:Sequences in FASTA of bulb onion orthologues of rice genes involved in male fertility and floral development identified using BLAST searches.
Genes	Sequences
CARBON SATRVED ANTHERS (CSA)	>c244438_g1_i1 GCAGCTTTTTCCTGATCTTCCTTCGAGTTTCTGAGCAATAAGGTTCCAGTTTTGAGGTCC ATGCTGCGAAACGAGTTCT TTTAGCTTTGCATCTTCCGCTGGCCTCCAGTGACCTCTAAC ACATAGCTTATGTTCCTGGCTTTCGATCTTTTCAGTGTTAGCGTTCACATTAAGTTCATG TTTCTTATTTGTGCCGT CATGATGTACGGAAAAAGGGAAGGAACCCATGGAAAAGGAAAA AAAGATTGTATTTTGATACTTTTCACGAAATGGGTTTGGACTAAAACCTCGGTATTCGAA GTAGGAAGAAGAAAG AAGGAATTTTTAATGGATTTTAATGTATGTTCTCAGAATTTGAGA CATTGAAGAAAGTGA…
PISTILLATA (OsMADS4)	>c95167_g1_i1 AAATAGCAACTCTTCTGCCCCAGCTCGAAAGCAGCCTCCTTTCCATTCCATCCATGGAAA TCTCATCTCTCCCCTTCTTT ATATTTTTCACTCTCTCCTTTCACTTAATTCTTACGCATG TTCCTTTTCTCAACAATAAGAGGGGCAAAATTATAAAATTGGAAAACAATGGGAAGGGGG AGGATTGAGATTAAGAGG ATCGAGAACTCAACGAATAGGCAGGTCACCTTCGCTAAGAGG AGGAATGGAATTATCAAGAAAGCGAAGGAGATTAGTGTTCTTTGCGAGTCAAAGATTGGG ATTGTTGTCTTTTCCA GTATGGGCAAAATGAGTGAGTACTGCAGTCTCAATACTAGTTTT CCATCACTCTTGGAAG…
AGAMOUS (OsMADS3)	>c34046_g1_i1 TAAATATTCATCTTGGCGGAAAAGGTCTATTAATTAATCAAGCAACAAGTTTTTTGAAGA AGCAT AAGTTTTTACAGTACAGATTAACGTATAGATGAAGTCATGCATTGTAATTATTAC ATAATATTGTGAATCCAAGAATCATTTACTAATCATAACTCTATCAGGGTTTGAAGGAGT GTAT TCTTGGATCGCAATTGATCCTGTACTTACCCAAGCTGGAGTGCAGTCTGCTGTTGA CTGCCATAATGGCCATTGCTAGTGTCCATCAAATTTGTGTGCATGTAGTTTCGTGAATCA TAT TGTGTCATTGTTTCATACTCGCTTGTAGATGCAGTTGGCAACACATTCATTTGTTGT TGCGCTCTTGACTCGT…
SEPALLATA3 (OsMADS7)	>c216523_g1_i1 ATACGCTATAATGGTAAAATAGGACAAAGAAATAAAAAAGAAAGCTATCAATTAGCAACG AAGAAAAGGACTACAAATTGC ATTTACCTCTATAAATAGCAAAGATATTAACCTTACCTT CCTTCCCCTTCATTCCAATATCCCAAATTGACATAAAAAACCATTCTTGTTAATTGGTTA AAGTATACCAATTAATCGAGA AAATGGGAAGAGGAAGAGTTGAACTCAAACGAATTGAAA ACAAGATCAACAGGCAAGTCACTTTCGCTAAGAGAAGGAATGGCTTGCTCAAAAAAGCAT ACGAGCTTTCAGTTTTATGTG ATGCAGAAGTTGCCCTTATCATCTTCTCTAATCGTGGCA AGCTTTATGAGTTTG…
AGAMOUS LIKE 6 (OsMADS6)	>c129731_g1_i1 AAGAAGAAGAAGAAGAAGAAGGTGAAAATTACTATACTGTGAAATATGGGAAGGGGAAGA GTTGAATTGAAAAGAATT GAGAACAAGATTAATAGACAAGTTACTTTCTCAAAAAGAAGA AATGGTTTGTTAAAGAAAGCTTATGAACTCTCTGTGCTTTGTGATGCTGAAGTTGCACTT ATCATTTTTTCCAGCAGA GGCAAGCTCTATGATTTTGGAAGCGTTGGCACCAGCAAAACA CTTGAGCGATATCAGAGATGTTGTTACACTTCTCAGGACGCTACAATTGCGGATCGTGAA ACACAGAGTTGGTACCAA GAGGTATCAAAACTGAAGGCAAAATTTGAATCGCTACAGCGT TCTCAGAGACATTTG…
TGA9	>c151564_g1_i1 AGGAGGATTGCAAGCTCATTTACCCGATAGTGATCTTAGAGTCTTGGTTGATGAATGCCT CTCTAACTACGATGAGATATTTCA TATAAAAGGCATGGCTGCCAAAATTGATGTGTTTCA TCTGATTACTGGAATGTGGATAACCCCAGCTGAAAGATGCTTCATTTGGATGGGTGGATT TAGACCCTCCAATCTCATCAAGATA CTGATGCCTCAGCTGGATCCACTAACGGAGCAACA GTTAATGGGAATATGCAGCCTGCAGCAGTCATCACAACAGGCAGAGGAAGCATTGTCCAA AGGCTTTGAGCAGCTGCAGTACTCCC TTACTGACACAATTTCAAGCGGGTCCCCCACCGA AATGGGACATATGGC…
JAGGED (STAMENLESS)	>c30443_g1_i1 GAAATAATAATCCTAATTTAGATCTTAATAATTTCCCTGAAGATTATGGAAAACTTCCAA TTGAGGAGAGTTCGACTACAACT GCTGCATCCACTGAAGCTATGAGGTTCAAAAAGAAGA AAAATGGAGGAAAGGATGATGGGAAGATATACGAGTGTAGATTTTGCTCTCTTAAGTTTT GTAAATCTCAAGCTTTGGGTGGCC ACATGAATCGACACCGACAAGAGAGAGAGACCGAGA CTCTTAATCGTGCTCGTCAACTCGTTTTCGGGAATGAAGAGCTTTCTGGCCCTGGAGATC ATCATCTAGGGAATTTTCATATGGG AATGTCATCAACACATGGATGTCAACCAAGAGGCG GAATCGGAGACCCATG…
MPK3	>c121397_g1_i1 AACCACTAATTCTTCCCATGAATGCAGCATGGATGATCAACTGTGCCATCCAATTCCCAT CTTTGCTTCAATATAGATAA TATAGACTTAGAAACTAATCTTTGATTATTGAGTCAAAAT GTTCATACAAACAATAAATTTCATGAAGAAAAAAAAGAAGAAAAAATCACACAGTTGTTC ATACAAACAAGAGCATCGCCAC AAAAATAAATAGTTTCTCTCCTTTAAACTCTGTAGCAT CTGATGCTACAGTAGAGCAACTGATCAACGACCAAATTGTGGATTCATAGATATTGCTTC GATATATATCAATTCTTTCATCTG GTCTTCAGTGAGAGCACGTTGCTCGAACTCGAACGA GAAAGGTTCCATGCA…
MPK6	>c123481_g1_i1 CTTGTATTGAATAATCGGTAAACTACGAAAAAACCTGACATCTGAGCAAGATACCAGTAC AAAACTTAATAGAAACCGCAAACA AACCAAACACTTAGTCGAGGTTTCCAAATATTTAAA CACCAAGCCGAAAGAAAGAAGCCGTAACAAATGATTTTCAGCAATGATACAATAACTAAA TGCACAAAACACCACCAAACTAGTACT GAATCCAACACTCAAGTACCCCCATGACATGCC AGAAGAATTAGTCAGGCAAATGGGAAAATAAAGTTACGTAAGAGATGATAATGATACATA TTTACATCAAGGAACTATCACAGATTGTGG ACAACGTACAATGTAAAGAAAGACTACACG AACTGAAGATGGTAA…
SWI1 (OsAM1)	>c201101_g1_i1 AGAGGATGGAGAAGTTTAAGAGGAGGAGGAGGAAGAAAGTGAGAATGCAAACCGAGAACG AGAATGGAAGGAAAGGGCCATCAAG AGGGTCTAAAGAGAGATGGTCTAATGAGAGGTACA AAACAGCAGAGTTGAAGCTGCTTGACATAATGAAGGAGAAAGGGGCAGTTCCTGGAAATC CTATTCTAAGGCAAGACTTGAGGGATGAA GCAAGGAACCATATTGGGGACACAGGGCTTC TTGACCATTTGTTGAAGCATATGGCTGGGAAAGTTGTGAATGAA
TPD1 (TDL1A)	>c21970_g1_i1 GAAAGTGAATTAAATTATGACCCCTTCCGTTTGCATGGAATCAGAGTAAACAGCCTCAAA ATTATTATCTCAGCTATGTATTCATCT GCATGCATGTAACATCAAATATACACACCCATA TACTTATATAAACAAAACGATCATCAGACACATGAAGCGGAGGAAACAGTCATCGGGTAA CTGAACGTATTAGCATACTGAAACGAAACGGT CTGACCACTTCCAATAGGACGTCCATCA TTAACAAGGCAATCGTTATGTCCCAACCTTCTGAATATTTTAGGATTCACCAGACGAGCT GAACTGTACCAACCACACGATATATGGATGTTTCCTA TACTGCATTTGTTGCATAAGTTT ATGACTTGAACTGTGT…
EMS1 (MSP1)	>c101027_g1_i1 GAGTTTTAGCCCACGGTAATTTCAAATCACATCACCGTGAATGCGGGCCT GCAAATCTTA AACAGTTTATCGACAACACATATTTCATTCACTAAACCTCATACAATTAAACATCAGCTA CGCTTGACATCATGTTATTGCTATTCCAAAGTTGGTTCTATTTCCTCGCTGCTACA CCAC ACCCTCCATCATCAACTCGATTTCCTTGAACCGCTTCACAACTTCAAGCATGCTCGGTCT CCTCCAAGGCTCATCCATCGTACACTCCTTACCCACCATCAAAACCCTCGTCATCACCTC CC TCCACTTCCTCTCCCCATCACCCCATAGACACGGATCGAGCACGTATCCTTCATCACC CTTCTCACTCATCCA…
MMD1	>c3619_g1_i1 AAATTTCAAACCCAAAACCTAAAAACACGCTCAGCATCAGTTTCGACCGTACGATCGGGA TCGCTGGCGATGCCGACGGCGGTGATCTC AGATCGCTCGTCAACTTCGAAAAGACGGAAG CGATGTAGGATTTACGGCCTCCGCACATTCATGGACCCAGGCTGCCCCACCGACTTTTCC GGTGCATTTCGCAACAACGTTCGCCGGTTCGTCAG AGAATGCGCTGACGTGGAGGATTAT AAGACGGTGGGCATGCCCACGTGGTGCACTTTGCTCGTTGATGATAATTCCGGCATCGTG GTCCCGCTTTATACGGTTGAGGAGTCTGTGCGGAATTCGGA TAAACCTTTTTGTGATTTC TGTCGATGCAATGGTTG…
WAX-DEFICIENT ANTHER 1	>c115430_g1_i1 AAAACTAATTATTCATCATGCTCAATCTTCTTCTCAAAAATTCAATACTCAAAAGTTCAA TATATAATTATACAGGTAAAATTCAATACTCAAAAATTCAATATATAATTA TACAGGTCT AGTATGCATATTGCATTATTAGCACATACATTGTAAACTTCTGCTTGTGATTGAGTGATG GACCAAATATAGTAGCGTACTTGCTTACACTGATGTATTAACTATTCAACACAAATT TGG ACTCCAATGCAGATGCCACTTGTGTATATGGAACAAAACCATGGTGCAAAGCAGCAGACC ACATTTTCTCCATGTCAAATGTTTTATCTCCGCATTCATGTGCATTCCATCCCTCTAATG CAT GCACTATCCCAG…
REDUCED ADH ACTIVITY	>c78051_g1_i1 GTTGTATAAAACAAGAATGAAGGTCAACGTATGTTAATTGTTTATAACAAATAATTTTGT AACATCACAGCGCAGATGCATAACATTCAGACGTAATACGCTTCTATGATGA AATAACAC TTACTTTAGTTATAACTTTAATATCTTTCCCACTCTCCATTAACCATTTACAATATTAAA TAAAGGTGATAACCAGGGAAACACGTATACTAATCCTATGTCAAAATTGTGAAACAAA AA CATGAACGATTAGTCAAAAAGAAGACGTCGCTTCACAGATTTTGGTATGGGATTATCTAG ATCATCAGACAGATTCTTGCCTTTCTTCGCATTATTATGTGCCATCTTCACTGCATCGTC ACTT GATGTTGGTCGA…
PERSISTENT TAPETAL CELL1	>c179910_g1_i1 GGGAAACTATAAAGAGCTAGCATAATAACATTTTAATATTGAATTGAAGGCAATGCAACA ATGTTGCTATCACATTGTTTGCATAAAAACAAAGCAGGGCACTCTTCATCT CCAAGCCCT GCACATTTGGTATGTTTCCACACCTCACAAATATCACACAACACCATTTTCTCACCATCT TCACTTTTGGCTCCACAATGGCAATCCACAACCTTATAATTACCTTCATAAACATCA TCT TCCCTAACATCACCCACAAAATCTCCGATCGC
AP3 SUPERWOMAN1 (OsMADS16)	>c229753_g1_i1 AGAGCACTAAAATGAACAAAACAATCACATTTCAGGATAATTAAGTAGCAACTTGACATG CATAAAGCTAGAGTAATACACTCATAAATCATACAGATAGCTCTAATTCAT AATAGATAG ATAGTGTAATAAGTAGCATATAGGTGCATGGAATAAAGCATCACAGAGAGTTCAAATACA GAATTGAGAGTATTATAAGCAGCTCTTAACCTCATTAACATCAGTAGTAAATAAAGT ACT CACACATTAAATTTATGAGGAAGAGGTTGCATGAAATATTGATATTCAAGCAAGGCGAAG ATCATGCAAACCAAAACCCATTCCATTAAGGTTGGGTTGATTTGGCTGAATTCTCATCGC GTA CATATGGTTTCC…
ENT-KAURENE OXIDASE	>c117603_g1_i2 GTACTGCATGCAGCTTGCTACTGCTGTAAGAGTCCAAATCCAAGCGTCCCCCTCAAGGCG AGATGTTCTATCCAATCCTATAGATAGCATCACTTGCGTTTCTCTTTCCTT CGCTTTTCT AATTACTGTTACTCCTAATTCTAATTCTATATAAACCCCGGCCGACATATATTATAAAAA AAATAAAGCATAAAATAAGTGCATTAGTGGGAGAGAATACGAATAACATCACGATGA CAG GTGCGCTGGTGGCGGTGACAGCTGGCGCAGTGTGTTTAGCTGTGGTGTGTTGGGCCCTCA AATGGGTGCACGAGTGGGTGTGGGAATCCGGTTTGGGCAAGGAGCGGAGGCGGAGGCTGC CGC CTGGGGACATGG…
RAS-RELATED NUCLEAR PROTEIN GTPASE	>c112324_g1_i1 GTTGCTCTGAATGCTAGAAGTTTCTAGAGCTATAAATCTCCTTTAAACCCTAACTGATAT CCCTCTTTTTTCATTATTTCATTCTGCGGTAATCAGATCTGATCAAAATCT CATGGCATT ACCGAATCAGCAAACCGTGGATTATCCAAGCTTTAAGCTTGTTATTGTGGGCGATGGAGG GACAGGAAAGACAACGTTCGTGAAGAGGCATCTCACTGGGGAATTTGAGAAGAAATA TGA GCCAACAATTGGTGTTGAGGTCCATCCCTTGGATTTTTTTACAAACTGTGGAAAGATTCG ATTTTACTGCTGGGACACAGCTGGTCAAGAGAAATTTGGCGGCCTTAGAGATGGATATTA CAT CCATGGTCAGTG…
IMPORTIN BETA1	>c223739_g1_i1 AACCCGTAAATGTAGAGCGCGTTTGAAAAGCTAGGGTTTTGAGAATTGAAATCCCGCTTC ACAAACTCCATCTTCCAGTCCAAGGAATAATCAAATATTATATAAACCCCT TGATTGTCT CTCTCGCTCTGTATCCGCCATCATTCTCCAATCAAATCAAATTAACGTCCAAAGCCCCGA TATCTTTCTTTATTCAGCTAGATCTAATCACTCGAGGTATATAAAGCAACTACCTAT TAA ACCCAAATGGCAATGGAGATTACTCAAATCCTTTTGTCTGCCCAATCCCCTGATGCACAG ATTCGTACACAAGCAGAAGTAACCCTTAAGCAGTTCCAGGAACAAAATCTCCCTCACTTC CTA TTCTCCTTATCT…
ATSIZ1/SIZ1	>c119191_g13_i1 TTTTACTTTCTTCCTCTTTAGTTAGTGCAATAGTTTTGCGAGTTGAGTGGTTGATTCGAA CTGTCTCTCCAAAATAAGGGTTTTGGAGAGATGGACTTGATAACTAGCTGT AAGGATAAG CTGGCATATTTCAGAATAAAAGAGCTTAAATATGTTCTTACTCAGCTCGGACATCCAAAG CAAGGGAAGAAGCAGGAACTGGTGGAC
SOLO DANCERS	>c104859_g1_i1 CTTTGCTTATTACATGTGCACGTTCTTCATAGTTGAGTTGTTTGCCACTTGGTCTCTCCA TAGATATACACTATATGTGCAGATCTTTAGTGGTCTTTAGGTTCCAGTGGCT ACTACGGA AAATGTGCCAGCGGCGACTGCAGTGGACTCTTCTACTGCAGTGGTGTCGGAGGTACGCCG TTGGCCCTGTTCACCGAAAAAATAGTCTTTAGGTTCTCTACTAGTGGCATGCATTGTAT A TCCACTCTGTCCTTTTTAAATTGTTAGTGTAATCCAGATATGCCAGCTATGCATTCAAGA TTTTACAATTTATATTTATACGAGCATGTTGTCATAAACAATGAAGTTGCTATAAATAAC AATTAC TTCAATTGT…
SUCROSE TRANSPORTER	>c87072_g1_i1 ATATATATATATATATATATAATGAAACTATAAGACTGATAAAAATCAACTGCCGCTTCT TATGAAGCAGGACTATTACAACCATGTAACACAAACCTTCCACATTTATTTCT CTTCATT CACAATGAACTAGCACAAACTTCTCCTTTCTATTATAAAAAGGGGACAAAACACCAAATG ACATAATTCAAAAACTGATTAAGAGCATATGGGATATGTTCCCTTATCATCGCCCACTAT ACTCATGTTATATATGTTGTTGACCATTAGTGCATGCCACCCATTCCGCTAGACTTGAAA TTCGATCTCGAAAGCCTAGGAAGTATGAACAATCCAAGTATGCCACATATAAAGGCAAAT GCAGATG CCAGTGCAAA…
CYTOCHROME P-450B	>c74282_g1_i1 TTTCTATACTAATACATACACCTACACTGCAATGTAAATCCTGCTTTCAATACAGGGATA TATTACCGCTCGTTGCACCACTGTATGTCTGTGGTGATCCTGACTATTATCAT ACAAATT ATCAGCACAGGTACCTCAACGATTTATAACAATTTAAAGAAAAATGGAGGACAAAATGAA ACTGTATCAAACAAATCCACAACGATACTACCATGATTAATGCATCACAGTTAGTTGAAC CTTAATATTACAATATCATCATATTCTTCGAGAGACAGTGAGCTTCAATCCATGTGCCAT GGATAATATAGTCATCATTCTATAATGCACCGGATGATTCGGAACCAGTTTGAAAGTAAA AAATCTA CATAATATGG…
MYOSIN XI B	>c106734_g1_i1 len=2819 path=[3913:0-57 3971:58-193 @4107@!:194-2094 6007:2095-2703 112:2704-2818] TGTCATCATAAGATAACCTGTATTTCTGA AATATTACCAAGAAACCCACAGCTTGCTTTG TGTGTATAAGTTCTTCGAAGCATGAGCCAGCATACTCTGCTCTGGTTTGGTTGCACCATA CTTCCAATTCATCTAAACCTGATTTCACATATTCTC CATTGCTGAAGGAGCAGCATTCCC GTCGTAACAAGAGACTATTGAAAATCTGTACGTTGATGAAGCAGTAAACTTGAGTAAATA ATTTCTGAATAAGAACTGGAGCCACAAAGTTATCTTGTAATAT CTCCAAAATG…
APOPTOSIS INHIBITOR 5	>c81284_g1_i1 len=2394 path=[51:0-2393] AAGTAGCTACGACCTCAGTTCCTAGCCCCTTTCCAAAACTAAATCGACATCCCAAATAAG CAAAAGAAACCCGAAACAATCAGTCATT CGCGGCTTCTTCAAAACCCTAAATCCTCCGAA ACCATGCCCCCTAGCTCCTCCGATGTTGAAGTAGAGAAGCTCTACGACGCTGGAGAGCGC CTTAGCGAATCGAAAGACAAGTCTCAGAATGTGAG AGACTATGAAGAGATTATAATGGCT GTTAAAGGCGGAAGCGTCAAAGCAAAACAGCTAGCAGCTCAGCTTATTCCCAGGTTTTTT AAGTTCTTTCCAACCTTGGCCACTAGGGCAATTACCGCTCTT TTTGATTTG…
ENT-KAURENE SYNTHASE	>c83938_g1_i2 AGGAGTACAAGTGTCCGCGATGTGGATGATACAGCCATGGGTTTTCGTGTACTTAGGCTG CATGGCTACGATGTCTCTGCTGATGTTTTCAAGTCTTTCGAATCGGATGGAGA GTTTTTC TGCTTTGTTGGACAATCAAACCAAGCAGTTACAGGAATGTACAACCTGAACCGAGCTTCC CAGATTCAATTGCCGGGTGAAACTATTCTAGAAAGAGCTAGAAATTTCTCCACCAAATTC CTAAGGGAAAAGCAAGCACAAAACAAACTTGTTGACAAGTGGATCATCACAAAAGATTTG CCTGGGGAGGTAGAGTATGCACTAGACTTTCCATTCTATGCAAACCTACCGCGCATAGAA GCAAGAT GGTTCATCGA…
SHOOTLESS2	>c78229_g1_i2 ATGTTGGCTTGTGTAAGGATGGCATAGTTGAAGGATCTGACTATAAAAATGAGGATATTT GTGAATAAAAGGAGGTGGTTGATGAGGTGTTTGGATGAACTTAGGCTATTAGA GAAATGG TAGTGCTTTATTCAGGTTTTCAGTCCTTGTGTTGAGAATACCATTTAGAAGCATGAGGAG TGTTGTAAGAGTACGAAGGAGAGGAAAGAGGTTGTAAAGGGTACAATTATTTTGGCTAAA AATCCATGTTTGCATCCAGGTGATGTTAACGTACTTGAAGCAATTGATGTGCTGGAATTT AAACATCTCATGGACTGTTTGGTTTTTCCCCTGAAAGGAGATAGACCACATTCGAATGAG GCTAGTG GAAGCGACCTT
DMC1	>c43784_g1_i1 ATGAAGCTGCAGAAAAGATAGTGAGTAGTGGTTATATGACAGGAAGTGAACTTATGCTTA AAAGGAAATCAGTGATTAAAATTATGACCGGTAGCCAAGCTCTTGATGAACTT CTTGGTG GTGGAATAGAGACTTCTCAGATCACTGAGGCATTTGGAGAATTCAGATCGGGCAAAACAC AACTGGCTCATACTTTATGTGTCTCAACCCAGCTTCCAATATCTATGCATGGTGGCAACG GGAAAGTTGCTTACATCGACACTGAAGGAACATTTCGACCAGATCGAATTATTCCAATTG CTGAGCGGTTTGGCATGGACCCTAATGCTGTCCTTGACAACATTATATATGCTCGTGCAT ATACATA TGAGCACCAG…
ZEP1	>c116971_g1_i3 TAAGTGAGTTATCTTCTGTCCTTGTCCTTTCCTTCTCACAAACAGTGTGAATACCTTGTC TAACCTAATGCATTATCTGTAATTATGCTCATCTGTTTTACATACAGATGCTC TTATCAA GCAGCTAGAAGATGACATTGAAGAAAACAAGAAACAGTTGCTAACTGTTGGCTCCCAACT GCATGAAGCAAAGCACGATCTTACAGTAAAAGAAGAGATTTTTATCAGGTTAAAAGCAAG CGAAGAGGCTTTACGGAATGAAAAGCATGGTTTAGAATGTAACAATCGAAGTTTATTGTT AGAATTAGATAAATCAGTTCAAGAATTCAAGGAGCTAAAAAGTGTGGTCTACAATTTGTC AACCAAA GCTGTAGAA…
POLLEN SEMI-STERLITY1	>c115973_g1_i1 TTAAAAATATTTCATACCCCGGATTTCGGAATTTGCCCTTTCACTGTCTCAATAAATACG CGCCCAAATTTCCAGACTCTGTTAGTTCTCAAGTGCTGAAAAGTTCGGAAAG ATCACAGC TTATACGTCAGTGATAGGAATGGAACCAAAAACGTCAAATGTCAAGGTTTGTGTTCGGTT TAGACCTCTAAATTCAAGAGAGAAGAAGATCAGTGGCGATGAAATATGTTTTCGTCAGT T AGATTCAGAATCGTTTGTGTTTAAGGATGAGAAGGGAGAAGATACTGCATTTAGTTTTGA TAGAGTTTTCTATATGGATTCTGAACAGTCGGACGTGTATGACTTTTTAGTTAAGCCAGT AGTACA AGATTCAGT…
REC8	>c107330_g1_i3 GAGTACCGACACATTTCTTGCTATTAAAAGAAAGCATATCCAAAAATAAGCATCATAAAT AATGCTCCAACACTAGTCTGAAAATGAAAAACAAAATACAAAAGATGCTAGA AGAGACAT TCTAAATATGTGCATTCTGGACAACCATAACTTAAAACTATATGCAGAACTTCATAACTT AGCGGTAATTCCTGTGCTTTCTTTGGTTGATGCATGAGCAAAAAATTTGCCTTATCTTG A TTCATTTTGAGAGTTTGGAAGATGAATAAGGATTCAAAGAGATCAAGATATCCCCATAAG CTTCTTTCTGTTGTACATCAATGACATTATAACACTTCAAAACCAGCGTTTCAAAAAACA TTTTTG CACATTGCT…
LIS1	>c65717_g1_i1 GATTCGGAGTAGATACGACTGGAAAAACGTACCTAAAGGGCCATTATCCCTCTTTCAATC AGAATGAACATTCTTATTTGAAACAAAACCATAATGACACATAATAGCAGGA ATCCAGCA TAAAGTCTTACAATAAACACTTACCAAATCAAAATAGCAGATGCAAAAAACTGATGTGAT CAGAACATCATATCAGACAAAGCAGAGCACGCTAGCTAAGATACTCGATTCAAGTACT TT GAACATTAATCTGAATCCAGAAACGTTGCCTCCATAACATACAACACAGCTACTGAACTC CAACCTAATTCTATAGAAACAAATTTAGCTGAACAAGAAGATGATAAACGTACAGTGCAA TCGC TACAACTATAAC…
